# Supplementary material for: Integrative analysis of metabolome and gut microbiota in Patients with pancreatic ductal adenocarcinoma
Source: PubMed Central journal article supplement (PMC8965132; doi:10.7150/jca.52943), 2022-03-06

## Supplemental Material

### Integrative analysis of metabolome and gut microbiota in Patients with pancreatic ductal adenocarcinoma

Xiaodong Guo<sup>1,\*,#</sup>, Zhengjun Hu<sup>1,#</sup>, Shu Rong<sup>3,#</sup>, Guoqun Xie<sup>1</sup>, Gang Nie<sup>2</sup>, Xuan Liu<sup>4</sup>, Gang Jin<sup>2,\*</sup>

1. Department of Oncology, Yueyang Hospital of Integrated Traditional Chinese and Western Medicine, Shanghai University of Traditional Chinese Medicine, Shanghai 200437, China.

2. Department of Hepatobiliary Pancreatic Surgery, Changhai Hospital Affiliated to Navy Medical University, 168 Changhai Road, Shanghai 200433, China.

3. Department of Nephrology, Shanghai General Hospital, Shanghai Jiao Tong University School of Medicine, Shanghai 200080, China.

4. Institute of Interdisciplinary Integrative Biomedical Research, Shanghai University of Traditional Chinese Medicine, Shanghai, 201203, China.

\* Corresponding author: Xiaodong Guo, Department of Oncology, Yueyang Hospital of Integrated Traditional Chinese and Western Medicine, Shanghai University of Traditional Chinese Medicine, Shanghai 200437, China.

E-mail address: [gxd\\_1996@shutcm.edu.cn](mailto:gxd_1996@shutcm.edu.cn).

Gang Jin, Department of Hepatobiliary Pancreatic Surgery, Changhai Hospital Affiliated to Navy Medical University, 168 Changhai Road, Shanghai 200433, China.

E-mail address: [jingang@sohu.com](mailto:jingang@sohu.com)

# Both authors contributed equally to this work.

Supplemental Material, Table S1. Identified significantly changed metabolites (fold change >1.5  $p < 0.05$  compared to resectable PDAC) in serum samples.

| VIP  | mz       | RT    | HMDB_ID     | Adduct | Name                                        | P        | FC(UN/RES) |
|------|----------|-------|-------------|--------|---------------------------------------------|----------|------------|
| 1.63 | 520.3396 | 8.92  | HMDB0010386 | M+H    | LysoPC(18:2(9Z,12Z)/0:0)                    | 1.44E-07 | 1.74E-14   |
| 1.37 | 522.3554 | 9.48  | HMDB0002815 | M+H    | LysoPC(18:1(9Z)/0:0)                        | 2.18E-05 | 3.51E-14   |
| 1.63 | 518.3218 | 9.24  | HMDB0240262 | M+Na   | LysoPC(0:0/16:0)                            | 1.15E-07 | 5.05E-13   |
| 1.15 | 546.3532 | 10.19 | HMDB0010384 | M+Na   | LysoPC(18:0/0:0)                            | 4.39E-04 | 9.57E-13   |
| 1.49 | 193.0346 | 1.09  | HMDB0000094 | M+H    | Citric acid                                 | 2.13E-06 | 1.05E-12   |
| 1.11 | 464.3350 | 5.68  | HMDB0013339 | M+Na   | 3-Hydroxy-11Z-octadecenoylcarnitine         | 1.31E-03 | 1.90E-12   |
| 1.14 | 302.3054 | 8.33  | HMDB0000269 | M+H    | Sphinganine                                 | 6.06E-04 | 2.39E-12   |
| 1.07 | 566.4282 | 5.81  | HMDB0011497 | M+H    | LysoPE(0:0/24:0)                            | 1.90E-03 | 2.84E-12   |
| 1.83 | 205.0972 | 4.01  | HMDB0000929 | M+H    | L-Tryptophan                                | 6.85E-10 | 3.06E-12   |
| 1.11 | 546.3554 | 9.26  | HMDB0010393 | M+H    | LysoPC(20:3(5Z,8Z,11Z)/0:0)                 | 6.56E-04 | 5.08E-12   |
| 1.32 | 494.3242 | 8.64  | HMDB0010383 | M+H    | LysoPC(16:1(9Z)/0:0)                        | 3.67E-05 | 7.42E-12   |
| 1.22 | 116.0708 | 0.79  | HMDB0000162 | M+H    | L-Proline                                   | 1.65E-04 | 1.06E-11   |
| 1.19 | 688.5205 | 10.30 | HMDB0007928 | M+H    | PC(14:1(9Z)/P-16:0)                         | 2.61E-04 | 1.07E-11   |
| 1.77 | 480.3362 | 9.50  | HMDB0010407 | M+H    | LysoPC(P-16:0/0:0)                          | 4.28E-09 | 1.21E-11   |
| 1.38 | 426.3577 | 9.59  | HMDB0005065 | M+H    | Oleoylcarnitine                             | 1.55E-05 | 1.25E-11   |
| 1.47 | 746.5639 | 10.73 | HMDB0007938 | M+H    | PC(15:0/18:1(11Z))                          | 2.82E-06 | 1.34E-11   |
| 1.57 | 802.5373 | 10.09 | HMDB0008182 | M+H    | PC(18:3(6Z,9Z,12Z)/20:5(5Z,8Z,11Z,14Z,17Z)) | 4.31E-07 | 1.43E-11   |
| 1.12 | 702.5439 | 10.75 | HMDB0008951 | M+H    | PE(16:0/P-18:1(11Z))                        | 6.32E-04 | 1.72E-11   |
| 1.91 | 834.6049 | 10.67 | HMDB0113305 | M+H    | PE-NMe(20:0/22:6(4Z,7Z,10Z,13Z,16Z,19Z))    | 5.77E-11 | 1.75E-11   |
| 1.79 | 482.3242 | 10.11 | HMDB0010381 | M+H    | LysoPC(15:0/0:0)                            | 2.40E-09 | 1.77E-11   |
| 1.44 | 764.5565 | 11.66 | HMDB0008029 | M+Na   | PC(16:1(9Z)/P-18:1(11Z))                    | 4.91E-06 | 2.04E-11   |
| 1.12 | 407.3017 | 8.26  | HMDB0011543 | M+Na   | MG(0:0/20:1(11Z)/0:0)                       | 6.14E-04 | 2.16E-11   |
| 1.08 | 159.0277 | 1.07  | HMDB0000157 | M+Na   | Hypoxanthine                                | 1.23E-03 | 2.69E-11   |
| 2.11 | 796.5260 | 11.09 | HMDB0009710 | M+Na   | PE(22:6(4Z,7Z,10Z,13Z,16Z,19Z)/P-18:1(11Z)) | 2.37E-14 | 2.73E-11   |
| 1.16 | 757.5617 | 9.54  | HMDB0114872 | M+H    | PA(16:1(9Z)/24:1(15Z))                      | 3.48E-04 | 2.73E-11   |
| 1.53 | 820.5269 | 11.66 | HMDB0112336 | M+Na   | PS(15:0/22:4(7Z,10Z,13Z,16Z))               | 1.00E-06 | 2.83E-11   |
| 1.95 | 188.0706 | 4.02  | HMDB0000734 | M+H    | Indoleacrylic acid                          | 1.69E-11 | 3.18E-11   |
| 2.04 | 424.3422 | 9.14  | HMDB0006461 | M+H    | Linoelaidyl carnitine                       | 4.76E-13 | 3.23E-11   |
| 1.72 | 548.3709 | 9.72  | HMDB0010392 | M+H    | LysoPC(20:2(11Z,14Z)/0:0)                   | 1.42E-08 | 5.02E-11   |
| 1.50 | 776.5732 | 10.24 | HMDB0009644 | M+H    | PE(22:5(4Z,7Z,10Z,13Z,16Z)/P-18:1(11Z))     | 1.65E-06 | 5.25E-11   |

|      |           |       |             |      |                                           |          |          |
|------|-----------|-------|-------------|------|-------------------------------------------|----------|----------|
| 1.37 | 542.3240  | 8.51  | HMDB0010397 | M+H  | LysoPC(20:5(5Z,8Z,11Z,14Z,17Z)/0:0)       | 1.61E-05 | 8.86E-11 |
| 1.31 | 468.3085  | 8.37  | HMDB0010379 | M+H  | LysoPC(14:0/0:0)                          | 4.79E-05 | 9.23E-11 |
| 1.59 | 550.3866  | 10.36 | HMDB0010391 | M+H  | LysoPC(20:1(11Z)/0:0)                     | 5.11E-07 | 1.11E-10 |
| 1.19 | 808.5815  | 10.38 | HMDB0000593 | M+Na | PC(18:1(9Z)/18:1(9Z))                     | 3.29E-04 | 1.18E-10 |
| 1.29 | 269.0879  | 1.28  | HMDB0000195 | M+H  | Inosine                                   | 1.03E-04 | 1.23E-10 |
| 1.34 | 111.0078  | 1.09  | HMDB0000243 | M+Na | Pyruvic acid                              | 2.89E-05 | 1.28E-10 |
| 1.14 | 248.1493  | 1.16  | HMDB0013127 | M+H  | 3-Hydroxybutyrylcarnitine                 | 4.85E-04 | 1.47E-10 |
| 1.99 | 144.0115  | 1.80  | HMDB0003417 | M+Na | D-Cysteine                                | 3.13E-12 | 1.74E-10 |
| 1.10 | 537.3620  | 5.75  | HMDB0115487 | M+H  | PA(8:0/16:0)                              | 2.35E-03 | 1.90E-10 |
| 1.08 | 572.3713  | 9.59  | HMDB0010401 | M+H  | LysoPC(22:4(7Z,10Z,13Z,16Z)/0:0)          | 1.00E-03 | 2.07E-10 |
| 1.29 | 733.5537  | 10.27 | HMDB0114793 | M+H  | PA(14:0/24:0)                             | 5.92E-05 | 2.10E-10 |
| 1.28 | 814.5718  | 11.09 | HMDB0008457 | M+Na | PC(20:4(5Z,8Z,11Z,14Z)/P-18:1(11Z))       | 7.26E-05 | 2.40E-10 |
| 1.61 | 506.3603  | 10.19 | HMDB0010408 | M+H  | LysoPC(P-18:1(9Z)/0:0)                    | 1.66E-07 | 2.53E-10 |
| 1.48 | 232.1544  | 3.60  | HMDB0000736 | M+H  | Isobutyryl-L-carnitine                    | 2.87E-06 | 2.55E-10 |
| 1.27 | 848.5942  | 11.10 | HMDB0009113 | M+Na | PE(18:2(9Z,12Z)/24:1(15Z))                | 8.51E-05 | 2.56E-10 |
| 1.16 | 391.3427  | 11.32 | HMDB0240583 | M+H  | Arachidonoylcholine                       | 3.87E-04 | 2.73E-10 |
| 1.26 | 590.3212  | 8.90  | HMDB0010404 | M+Na | LysoPC(22:6(4Z,7Z,10Z,13Z,16Z,19Z)/0:0)   | 1.06E-04 | 2.97E-10 |
| 1.53 | 621.3101  | 12.52 | HMDB0061690 | M+H  | LysoPI(20:4(5Z,8Z,11Z,14Z)/0:0)           | 8.90E-07 | 4.49E-10 |
| 1.20 | 792.5886  | 11.05 | HMDB0008095 | M+Na | PC(18:1(11Z)/P-18:1(11Z))                 | 2.19E-04 | 5.37E-10 |
| 1.22 | 527.4351  | 11.30 | HMDB0071469 | M+H  | TG(8:0/8:0/i-12:0)                        | 1.72E-04 | 5.44E-10 |
| 1.92 | 380.2562  | 8.29  | HMDB0000277 | M+H  | Sphingosine 1-phosphate                   | 4.06E-11 | 5.58E-10 |
| 1.16 | 882.5904  | 13.15 | HMDB0008321 | M+Na | PC(20:1(11Z)/22:6(4Z,7Z,10Z,13Z,16Z,19Z)) | 3.64E-04 | 7.06E-10 |
| 1.54 | 300.2896  | 11.65 | HMDB0000252 | M+H  | Sphingosine                               | 9.76E-07 | 7.92E-10 |
| 1.04 | 500.2748  | 8.88  | HMDB0011477 | M+Na | LysoPE(0:0/18:2(9Z,12Z))                  | 2.00E-03 | 8.66E-10 |
| 1.56 | 532.3438  | 9.68  | HMDB0011481 | M+Na | LysoPE(0:0/20:0)                          | 5.30E-07 | 8.80E-10 |
| 1.33 | 508.3395  | 9.05  | HMDB0011482 | M+H  | LysoPE(0:0/20:1(11Z))                     | 4.55E-05 | 1.01E-09 |
| 1.52 | 398.3265  | 8.96  | HMDB0006317 | M+H  | trans-Hexadec-2-enoyl carnitine           | 1.23E-06 | 1.02E-09 |
| 1.96 | 438.2982  | 9.46  | HMDB0011152 | M+H  | LysoPE(P-16:0/0:0)                        | 1.10E-11 | 1.03E-09 |
| 1.28 | 833.6449  | 11.65 | HMDB0042117 | M+Na | TG(14:0/15:0/20:5(5Z,8Z,11Z,14Z,17Z))     | 7.15E-05 | 1.09E-09 |
| 2.06 | 163.1328  | 5.70  | HMDB0033625 | M+H  | (3R,7R)-1,3,7-Octanetriol                 | 4.21E-13 | 1.22E-09 |
| 1.02 | 530.3580  | 9.72  | HMDB0013122 | M+Na | LysoPC(P-18:0/0:0)                        | 1.97E-03 | 1.25E-09 |
| 1.24 | 480.3037  | 5.67  | HMDB0011475 | M+H  | LysoPE(0:0/18:1(11Z))                     | 1.82E-04 | 1.34E-09 |
| 1.67 | 1109.6534 | 8.92  | HMDB0116822 | M+Na | CL(8:0/8:0/8:0/21:0)                      | 4.88E-08 | 1.74E-09 |
| 1.18 | 396.3108  | 8.51  | HMDB0013334 | M+H  | 9,12-Hexadecadienoylcarnitine             | 3.24E-04 | 2.00E-09 |

|      |                                  |       |             |      |                                                                                 |          |          |
|------|----------------------------------|-------|-------------|------|---------------------------------------------------------------------------------|----------|----------|
| 1.14 | 872.6079                         | 11.65 | HMDB0009410 | M+Na | PE(20:4(5Z,8Z,11Z,14Z)/24:1(15Z))                                               | 4.48E-04 | 2.01E-09 |
| 1.26 | 923.6897                         | 5.26  | HMDB0053013 | M+Na | TG(18:3(6Z,9Z,12Z)/20:3(5Z,8Z,11Z)/18:3(6Z,9Z,12Z))                             | 1.06E-04 | 2.10E-09 |
| 1.12 | 188.0686                         | 2.30  | HMDB0000159 | M+Na | L-Phenylalanine                                                                 | 5.81E-04 | 2.15E-09 |
| 1.90 | 476.2749                         | 9.18  | HMDB0011473 | M+Na | LysoPE(0:0/16:0)                                                                | 1.21E-10 | 2.34E-09 |
| 1.67 | 837.6191                         | 10.67 | HMDB0115089 | M+Na | PA(20:0/24:1(15Z))                                                              | 4.79E-08 | 2.40E-09 |
| 1.26 | 689.4934                         | 6.03  | HMDB0007208 | M+Na | DG(18:1(11Z)/22:6(4Z,7Z,10Z,13Z,16Z,19Z)/0:0)                                   | 4.09E-04 | 2.56E-09 |
| 1.02 | 262.1284                         | 1.11  | HMDB0061717 | M+H  | Succinylcarnitine                                                               | 1.99E-03 | 2.75E-09 |
| 1.43 | 436.3057                         | 8.60  | HMDB0013333 | M+Na | 3-Hydroxy-9-hexadecenoylcarnitine                                               | 9.50E-06 | 2.89E-09 |
| 1.64 | 538.3877                         | 10.74 | HMDB0011490 | M+H  | LysoPE(0:0/22:0)                                                                | 8.91E-08 | 3.17E-09 |
| 1.46 | <sup>1091.598</sup> <sub>8</sub> | 5.67  | HMDB0116851 | M+Na | CL(8:0/8:0/10:0/18:2(9Z,11Z))                                                   | 6.92E-06 | 3.21E-09 |
| 1.11 | 902.4752                         | 11.38 | HMDB0012450 | M+Na | PS(22:6(4Z,7Z,10Z,13Z,16Z,19Z)/22:6(4Z,7Z,10Z,13Z,16Z,19Z))                     | 9.45E-04 | 3.38E-09 |
| 1.27 | 778.4470                         | 0.77  | HMDB0012339 | M+Na | PS(14:0/20:4(5Z,8Z,11Z,14Z))                                                    | 7.43E-05 | 3.52E-09 |
| 1.07 | 908.6505                         | 10.16 | HMDB0113770 | M+H  | PE-NMe(11D5/13M5)                                                               | 1.09E-03 | 3.84E-09 |
| 1.68 | 536.3716                         | 9.91  | HMDB0011491 | M+H  | LysoPE(0:0/22:1(13Z))                                                           | 5.70E-08 | 4.38E-09 |
| 1.70 | 127.0366                         | 1.33  | HMDB0000008 | M+Na | 2-Hydroxybutyric acid                                                           | 2.24E-08 | 4.39E-09 |
| 1.30 | 718.4910                         | 5.26  | HMDB0009213 | M+Na | PE(18:4(6Z,9Z,12Z,15Z)/P-16:0)                                                  | 7.20E-05 | 4.65E-09 |
| 1.22 | 470.3206                         | 5.41  | HMDB0006455 | M+Na | Arachidonoylcarnitine                                                           | 4.17E-04 | 5.16E-09 |
| 1.04 | <sup>1571.967</sup> <sub>5</sub> | 9.24  | HMDB0058282 | M+Na | CL(18:1(11Z)/22:6(4Z,7Z,10Z,13Z,16Z,19Z)/18:1(11Z)/22:6(4Z,7Z,10Z,13Z,16Z,19Z)) | 2.30E-03 | 5.48E-09 |
| 1.59 | 422.3250                         | 8.76  | HMDB0000222 | M+Na | L-Palmitoylcarnitine                                                            | 2.54E-07 | 5.53E-09 |
| 1.03 | 522.2852                         | 7.05  | HMDB0000874 | M+Na | Tauroursodeoxycholic acid                                                       | 2.10E-03 | 5.87E-09 |
| 1.20 | <sup>1005.793</sup> <sub>5</sub> | 0.68  | HMDB0050849 | M+H  | TG(20:1(11Z)/22:6(4Z,7Z,10Z,13Z,16Z,19Z)/22:6(4Z,7Z,10Z,13Z,16Z,19Z))           | 2.95E-04 | 9.80E-09 |
| 1.06 | 711.5243                         | 5.35  | HMDB0013462 | M+Na | SM(d18:0/14:1(9Z)(OH))                                                          | 1.78E-03 | 1.04E-08 |
| 1.35 | 556.3371                         | 5.76  | HMDB0011492 | M+Na | LysoPE(0:0/22:2(13Z,16Z))                                                       | 4.12E-05 | 1.05E-08 |
| 1.24 | 733.4881                         | 5.31  | HMDB0114827 | M+Na | PA(15:0/22:4(7Z,10Z,13Z,16Z))                                                   | 1.67E-04 | 1.24E-08 |
| 1.84 | <sup>1001.692</sup> <sub>3</sub> | 9.49  | HMDB0061410 | M+Na | PC(DiMe(13,5)/DiMe(13,5))                                                       | 6.46E-10 | 1.54E-08 |
| 1.21 | 450.3575                         | 9.38  | HMDB0000848 | M+Na | Stearoylcarnitine                                                               | 1.87E-04 | 1.60E-08 |
| 1.91 | 382.2725                         | 8.47  | HMDB0001383 | M+H  | Sphinganine 1-phosphate                                                         | 6.87E-11 | 1.63E-08 |
| 1.54 | 368.2398                         | 5.03  | HMDB0061637 | M+Na | 3-hydroxyundecanoyl carnitine                                                   | 1.19E-06 | 1.95E-08 |
| 1.26 | 372.3110                         | 10.72 | HMDB0005066 | M+H  | Tetradecanoylcarnitine                                                          | 9.10E-05 | 2.60E-08 |

|      |               |       |             |      |                                                                                             |          |          |
|------|---------------|-------|-------------|------|---------------------------------------------------------------------------------------------|----------|----------|
| 1.07 | 190.0858      | 6.41  | HMDB0002302 | M+H  | Indole-3-propionic acid                                                                     | 1.82E-03 | 3.85E-08 |
| 1.61 | 434.2856      | 5.21  | HMDB0013335 | M+Na | 3-Hydroxyhexadecadienoylcar<br>nitine                                                       | 2.33E-07 | 3.94E-08 |
| 1.28 | 952.6765      | 10.26 | HMDB0112735 | M+Na | PS(22:0/24:1(15Z))                                                                          | 6.29E-05 | 4.42E-08 |
| 1.21 | 769.5552      | 6.56  | HMDB0114831 | M+Na | PA(15:0/24:0)                                                                               | 7.81E-04 | 4.84E-08 |
| 1.17 | 945.6708      | 5.26  | HMDB0010536 | M+Na | TG(20:5(5Z,8Z,11Z,14Z,17Z)/<br>18:2(9Z,12Z)/20:5(5Z,8Z,11Z,<br>14Z,17Z))                    | 3.42E-04 | 6.10E-08 |
| 1.54 | 1019.703<br>8 | 10.18 | HMDB0010560 | M+Na | TG(22:6(4Z,7Z,10Z,13Z,16Z,1<br>9Z)/20:5(5Z,8Z,11Z,14Z,17Z)/<br>22:6(4Z,7Z,10Z,13Z,16Z,19Z)) | 7.42E-07 | 1.85E-07 |
| 1.02 | 632.4416      | 7.62  | HMDB0008855 | M+H  | PE(14:1(9Z)/14:1(9Z))                                                                       | 2.41E-03 | 3.96E-07 |
| 1.04 | 535.0370      | 5.30  | HMDB0001018 | M-H  | UDP-D-Xylose                                                                                | 5.51E-08 | 3.91E-04 |
| 1.33 | 757.4882      | 5.30  | HMDB0010570 | M+Cl | PG(16:0/16:0)                                                                               | 1.27E-07 | 4.65E-02 |
| 1.30 | 682.4041      | 5.41  | HMDB0008856 | M+Cl | PE(14:1(9Z)/15:0)                                                                           | 1.21E-13 | 6.19E-02 |
| 1.11 | 768.4937      | 5.49  | HMDB0112331 | M-H  | PS(15:0/20:4(5Z,8Z,11Z,14Z))                                                                | 3.45E-08 | 8.00E-02 |
| 1.60 | 470.3203      | 5.27  | HMDB0006510 | M-H  | Cervonyl carnitine                                                                          | 1.89E-14 | 8.78E-02 |
| 1.17 | 732.4722      | 0.78  | HMDB0009147 | M+Cl | PE(18:3(6Z,9Z,12Z)/P-16:0)                                                                  | 1.15E-09 | 9.14E-02 |
| 1.05 | 841.5553      | 10.46 | HMDB0115170 | M+Cl | PA(20:4(5Z,8Z,11Z,14Z)/24:1(<br>15Z))                                                       | 2.87E-08 | 1.01E-01 |
| 1.03 | 800.6676      | 0.72  | HMDB0011695 | M-H  | SM(d17:1/24:0)                                                                              | 2.92E-06 | 1.07E-01 |
| 1.67 | 756.4861      | 5.29  | HMDB0112297 | M-H  | PS(14:0/20:3(5Z,8Z,11Z))                                                                    | 3.25E-13 | 1.38E-01 |
| 1.13 | 285.2064      | 8.82  | HMDB0000672 | M-H  | Hexadecanedioic acid                                                                        | 5.77E-06 | 1.44E-01 |
| 1.14 | 674.5108      | 0.78  | HMDB0008851 | M-H  | PE(14:0/P-18:0)                                                                             | 1.10E-09 | 1.45E-01 |
| 1.06 | 818.4440      | 0.77  | HMDB0009210 | M+Cl | PE(18:4(6Z,9Z,12Z,15Z)/22:6(<br>4Z,7Z,10Z,13Z,16Z,19Z))                                     | 3.20E-07 | 2.24E-01 |
| 1.13 | 688.5242      | 0.78  | HMDB0007895 | M-H  | PC(14:0/P-16:0)                                                                             | 1.06E-07 | 2.27E-01 |
| 1.18 | 751.4957      | 5.48  | HMDB0114825 | M+Cl | PA(15:0/22:1(13Z))                                                                          | 7.60E-09 | 2.37E-01 |
| 1.16 | 1502.054<br>6 | 5.92  | HMDB0057130 | M-H  | CL(18:0/18:1(11Z)/20:4(5Z,8Z<br>,11Z,14Z)/20:4(5Z,8Z,11Z,14Z<br>)                           | 7.42E-09 | 2.44E-01 |
| 1.10 | 297.2428      | 9.52  | HMDB0010736 | M-H  | 3-Oxoostadecanoic acid                                                                      | 1.29E-07 | 2.90E-01 |
| 1.09 | 702.5282      | 0.79  | HMDB0007961 | M-H  | PC(15:0/P-16:0)                                                                             | 8.12E-09 | 2.92E-01 |
| 1.20 | 781.4604      | 5.49  | HMDB0114918 | M+Cl | PA(18:1(11Z)/22:6(4Z,7Z,10Z,<br>13Z,16Z,19Z))                                               | 3.12E-10 | 2.92E-01 |
| 1.22 | 990.7927      | 0.67  | HMDB0008783 | M+Cl | PC(24:0/24:1(15Z))                                                                          | 2.68E-11 | 2.97E-01 |
| 1.33 | 255.2325      | 11.53 | HMDB0000220 | M-H  | Palmitic acid                                                                               | 8.90E-15 | 3.22E-01 |
| 1.44 | 277.2167      | 10.67 | HMDB0001388 | M-H  | alpha-Linolenic acid                                                                        | 3.67E-16 | 3.22E-01 |
| 1.16 | 812.4044      | 0.78  | HMDB0012351 | M+Cl | PS(14:1(9Z)/22:6(4Z,7Z,10Z,1<br>3Z,16Z,19Z))                                                | 9.28E-10 | 3.31E-01 |
| 1.12 | 822.5689      | 5.42  | HMDB0007887 | M+Cl | PC(14:0/22:1(13Z))                                                                          | 5.17E-09 | 3.42E-01 |
| 1.34 | 279.2326      | 11.10 | HMDB0000673 | M-H  | Linoleic acid                                                                               | 4.84E-15 | 3.44E-01 |
| 1.29 | 188.0170      | 1.62  | HMDB0001476 | M+Cl | 3-Hydroxyanthranilic acid                                                                   | 2.55E-13 | 3.49E-01 |

|      |          |       |             |      |                                             |          |          |
|------|----------|-------|-------------|------|---------------------------------------------|----------|----------|
| 1.14 | 734.4723 | 0.78  | HMDB0008847 | M-H  | PE(14:0/22:6(4Z,7Z,10Z,13Z,16Z,19Z))        | 5.14E-09 | 3.50E-01 |
| 1.25 | 810.4076 | 0.78  | HMDB0112496 | M+Cl | PS(18:4(6Z,9Z,12Z,15Z)/18:4(6Z,9Z,12Z,15Z)) | 3.15E-12 | 3.53E-01 |
| 1.35 | 281.2481 | 11.66 | HMDB0000207 | M-H  | Oleic acid                                  | 6.56E-15 | 3.60E-01 |
| 1.15 | 916.7056 | 0.69  | HMDB0013449 | M+Cl | PC(O-22:0/22:3(10Z,13Z,16Z))                | 1.76E-09 | 3.70E-01 |
| 1.18 | 101.0238 | 1.29  | HMDB0000005 | M-H  | 2-Ketobutyric acid                          | 3.58E-08 | 3.84E-01 |
| 1.19 | 823.5543 | 5.63  | HMDB0116585 | M-H  | PG(20:4(5Z,8Z,11Z,14Z)/20:1(11Z))           | 5.21E-10 | 4.04E-01 |
| 1.59 | 171.0654 | 5.38  | HMDB0000341 | M-H  | 2-Octenedioic acid                          | 1.41E-20 | 4.04E-01 |
| 1.33 | 307.2635 | 11.80 | HMDB0005060 | M-H  | Eicosadienoic acid                          | 3.86E-11 | 4.24E-01 |
| 1.08 | 596.4013 | 5.18  | HMDB0010699 | M+Cl | CerP(d18:1/12:0)                            | 8.99E-07 | 4.48E-01 |
| 1.07 | 750.5247 | 5.93  | HMDB0007897 | M+Cl | PC(14:0/P-18:1(11Z))                        | 1.07E-07 | 4.49E-01 |
| 1.24 | 283.2638 | 12.53 | HMDB0000827 | M-H  | Stearic acid                                | 9.22E-12 | 4.49E-01 |
| 1.01 | 119.0342 | 0.76  | HMDB0000337 | M-H  | (S)-3,4-Dihydroxybutyric acid               | 2.86E-07 | 4.50E-01 |
| 1.29 | 124.0096 | 0.78  | HMDB0000251 | M-H  | Taurine                                     | 6.71E-11 | 4.76E-01 |
| 1.14 | 723.5022 | 5.48  | HMDB0114846 | M-H  | PA(16:0/22:4(7Z,10Z,13Z,16Z))               | 3.08E-08 | 4.82E-01 |
| 1.08 | 720.5002 | 5.48  | HMDB0009215 | M-H  | PE(18:4(6Z,9Z,12Z,15Z)/P-18:1(11Z))         | 1.88E-07 | 4.85E-01 |
| 1.16 | 530.3017 | 9.24  | HMDB0010382 | M+Cl | LysoPC(16:0/0:0)                            | 1.03E-09 | 5.15E-01 |
| 1.06 | 154.0615 | 0.76  | HMDB0000177 | M-H  | L-Histidine                                 | 1.01E-07 | 5.76E-01 |
| 1.12 | 303.2325 | 11.00 | HMDB0001043 | M-H  | Arachidonic acid                            | 1.91E-07 | 5.99E-01 |
| 1.05 | 89.0241  | 1.06  | HMDB0000190 | M-H  | L-Lactic acid                               | 2.68E-08 | 6.00E-01 |
| 1.05 | 327.2324 | 10.85 | HMDB0002183 | M-H  | Docosahexaenoic acid                        | 2.18E-06 | 6.25E-01 |
| 1.06 | 504.3092 | 8.92  | HMDB0011483 | M-H  | LysoPE(0:0/20:2(11Z,14Z))                   | 5.83E-05 | 7.00E-01 |
| 1.10 | 502.2932 | 9.22  | HMDB0011484 | M-H  | LysoPE(0:0/20:3(11Z,14Z,17Z))               | 3.81E-04 | 2.35E+00 |
| 1.45 | 892.6483 | 6.32  | HMDB0009245 | M+Cl | PE(20:0/24:1(15Z))                          | 1.75E-09 | 3.39E+00 |
| 1.67 | 652.4622 | 6.18  | HMDB0010700 | M+Cl | CerP(d18:1/16:0)                            | 8.08E-15 | 4.91E+00 |

Figure S1. Microbial alpha diversity decreased in Unresectable PDAC and resectable PDAC patients shown by Chao 1 diversity index. (Chao1 index,  $p = 0.81$ ).

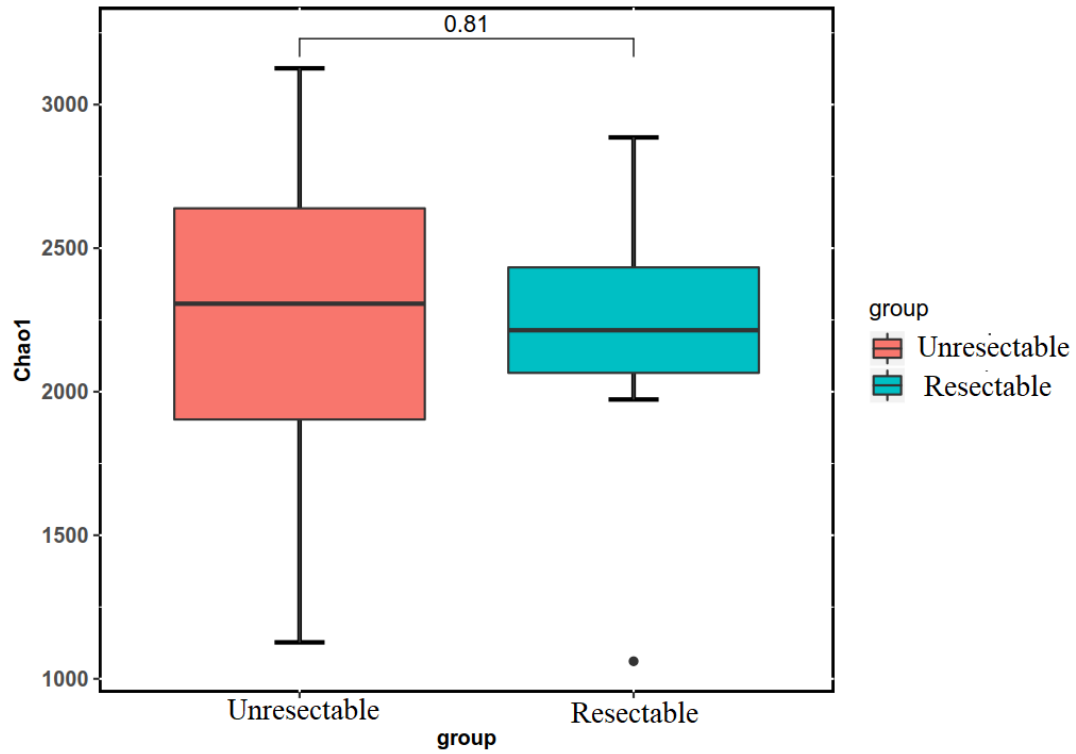

Figure S2. Relative abundance of the bacterial Species.

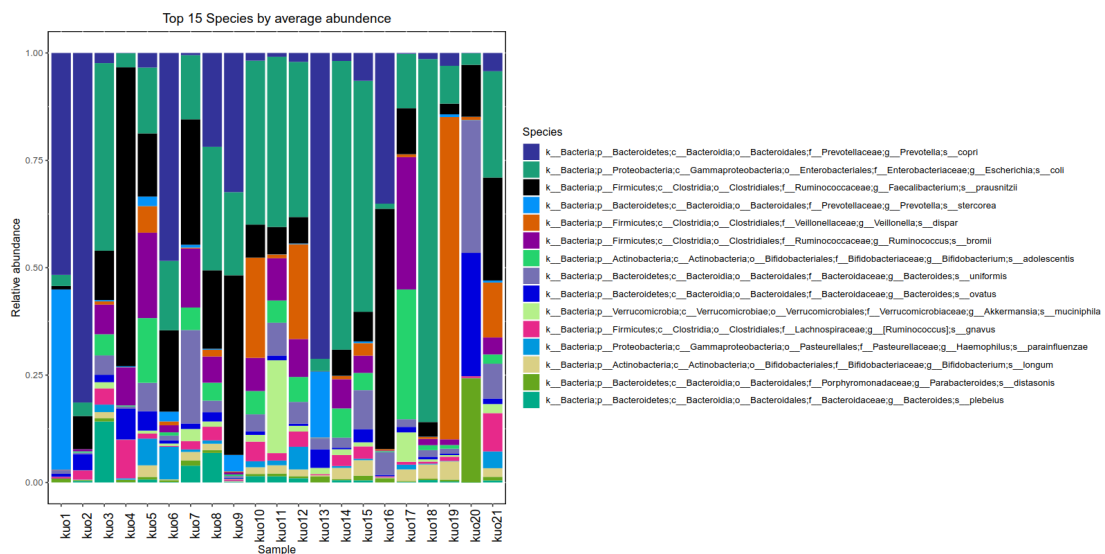

Supplement: jcav13p1555s1.pdf [file jcav13p1555s1.pdf]
